# Supplementary material for: Cerebral Cavernous Malformation 1 Determines YAP/TAZ Signaling-Dependent Metastatic Hallmarks of Prostate Cancer Cells
Source: MDPI journal article supplement (doi:10.3390/cancers13051125), 2021-03-05

Cerebral cavernous malformation 1 determines YAP/TAZ  
signaling-dependent metastatic hallmarks of prostate cancer cells

1. Shown are representative images of our  
functional assays in figure 2A, 2B and 4F.

Figure 2A

PC3

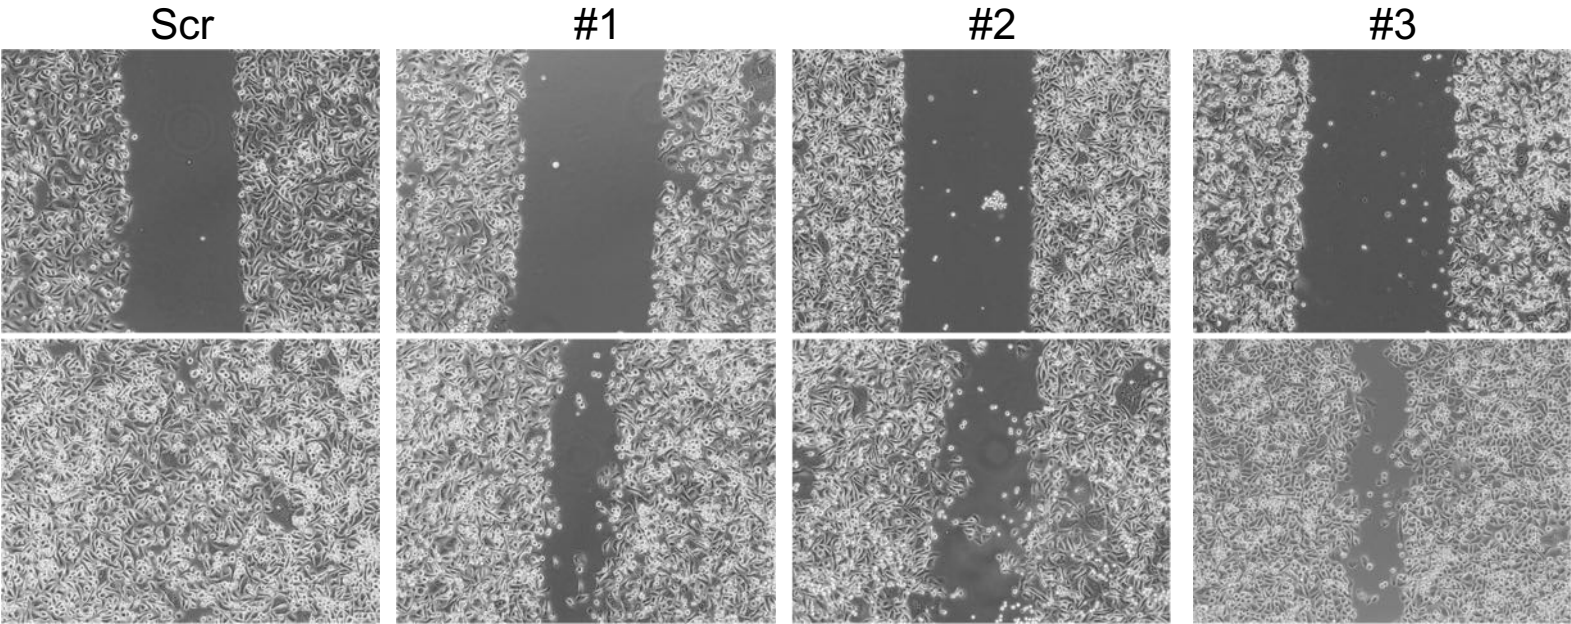

DU145

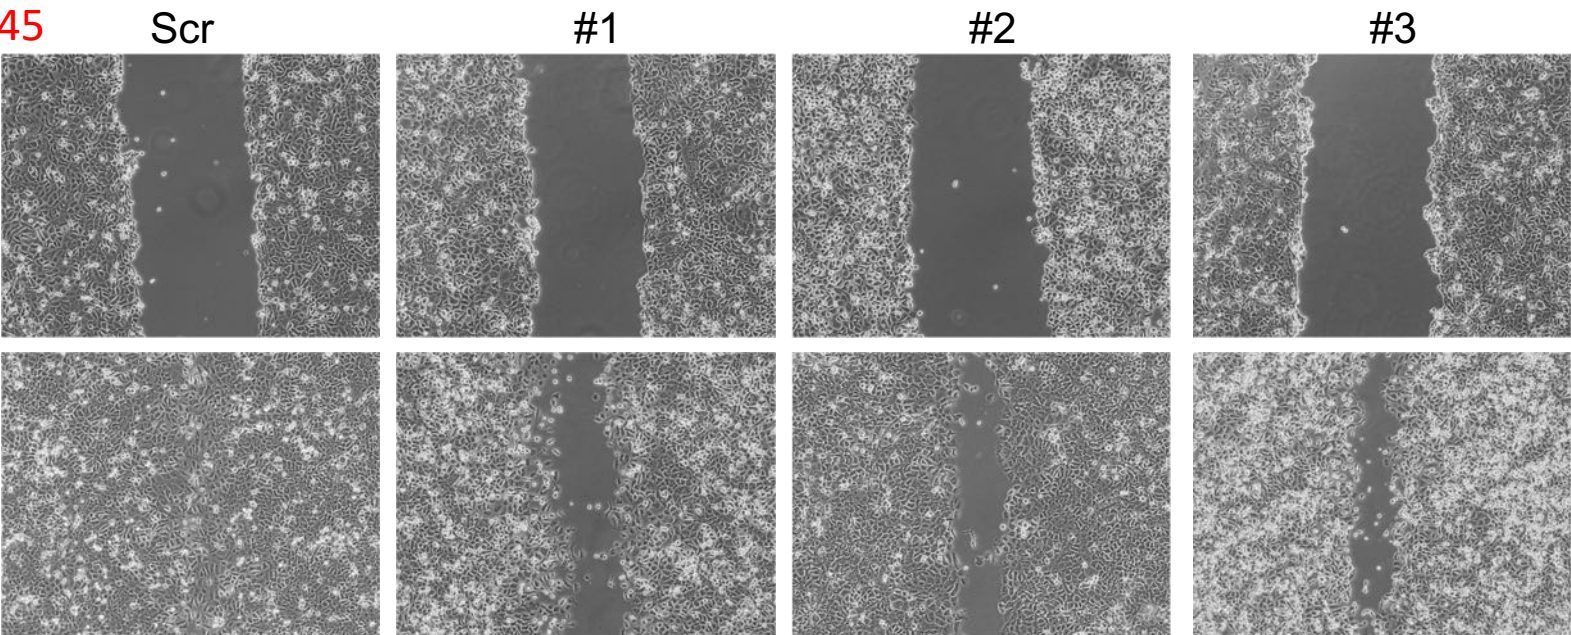

Figure 2B

PC3

Scr

#1

#2

#3

Migration

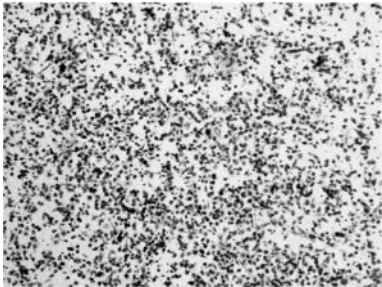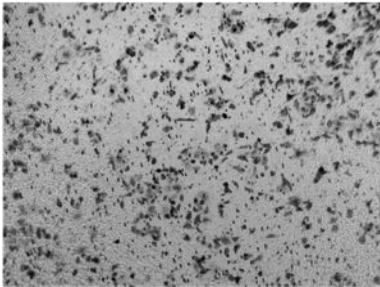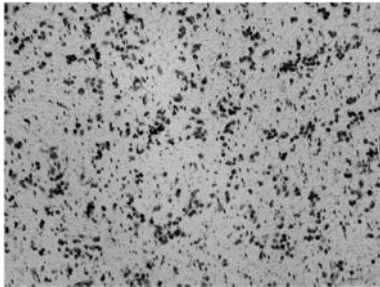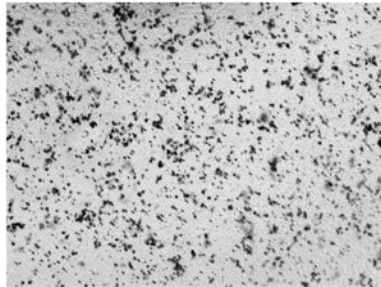

Invasion

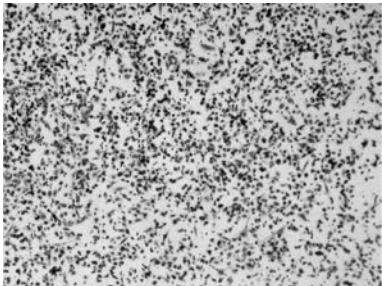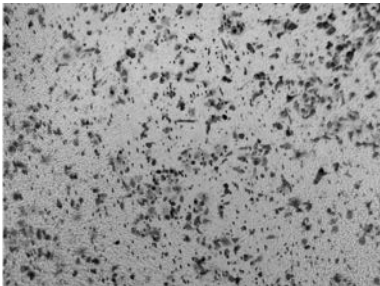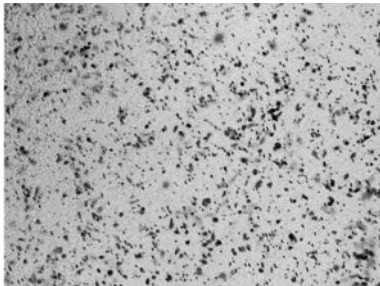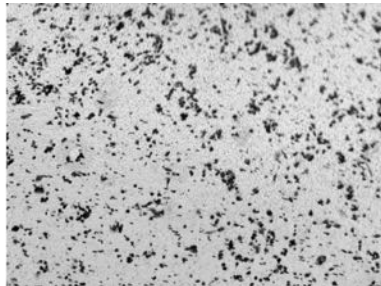

Figure 4F

PC3 migration

Scr

#1

#2

#3

Scr

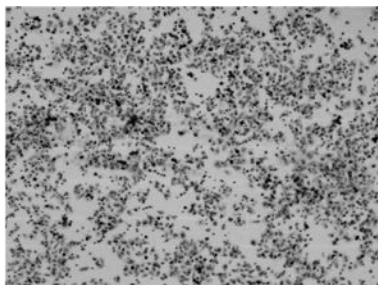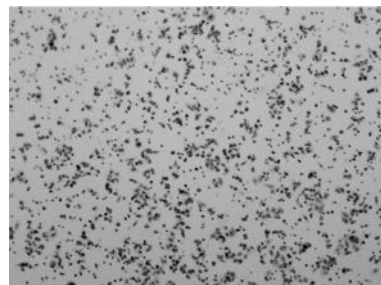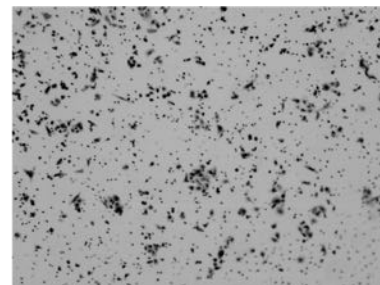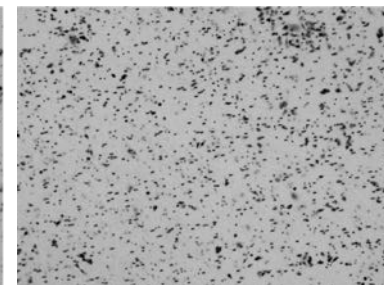

si DDX5

co-knockdown

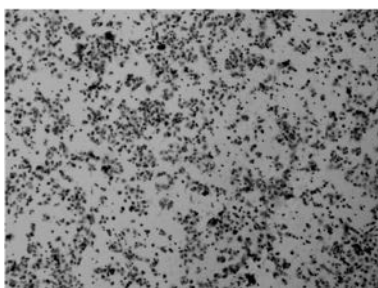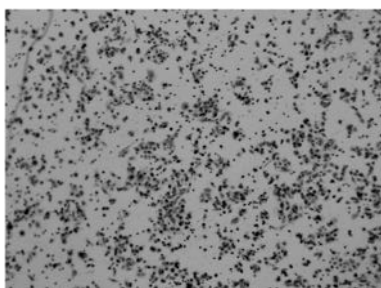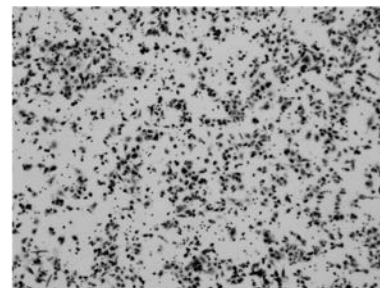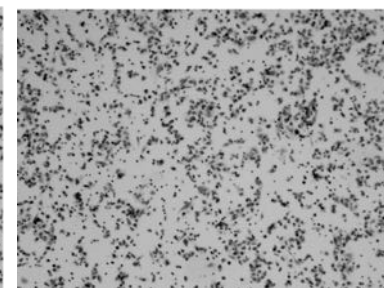

PC3 invasion

Scr

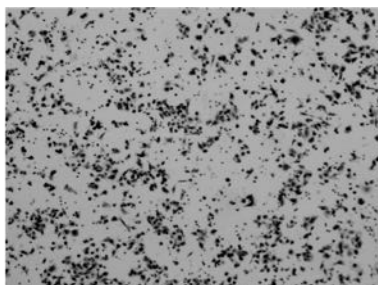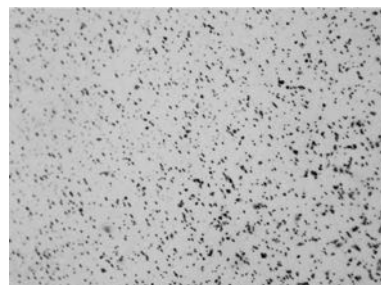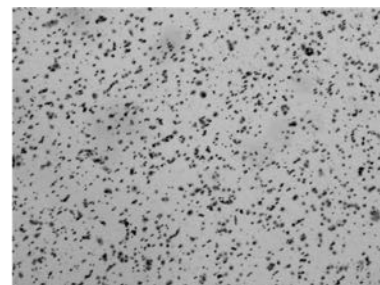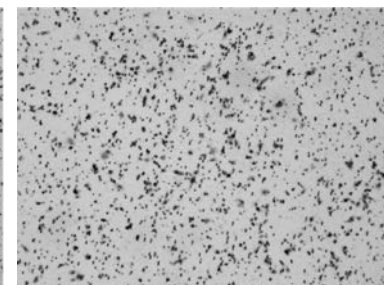

si DDX5

co-knockdown

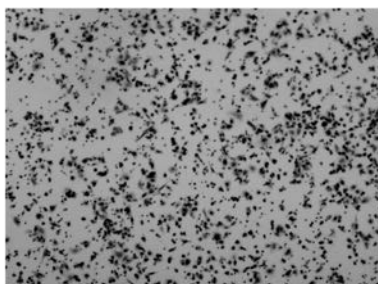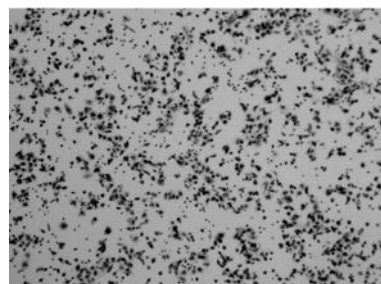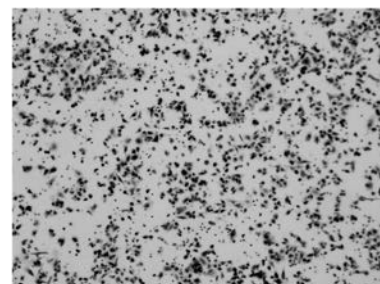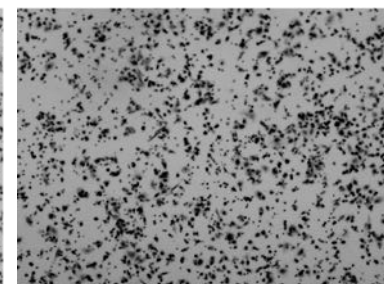

## 2. Full gel pictures.

In our study, many membranes were cut into slices or stripped to probe multiple antibodies, when necessary for comparisons including normalization.

When the boundary of each membrane slice is not clear due to short exposure from high band signals, we show extra-space enough to include the slices.

Figure 2C

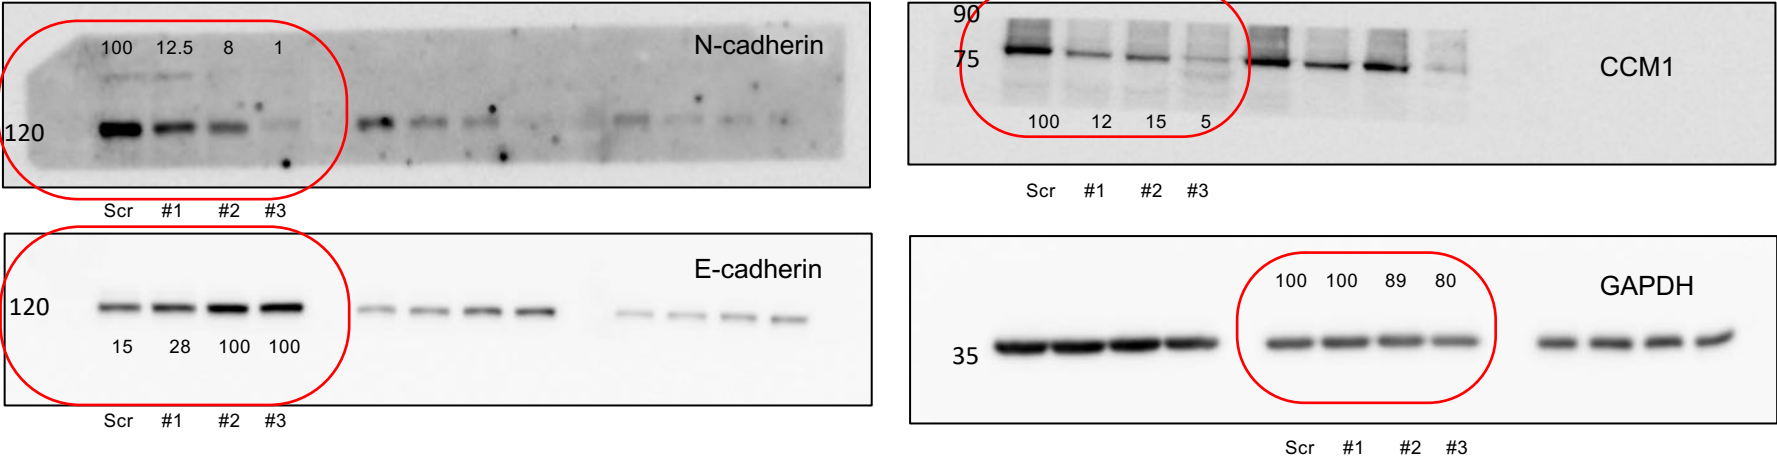

Figure 3E

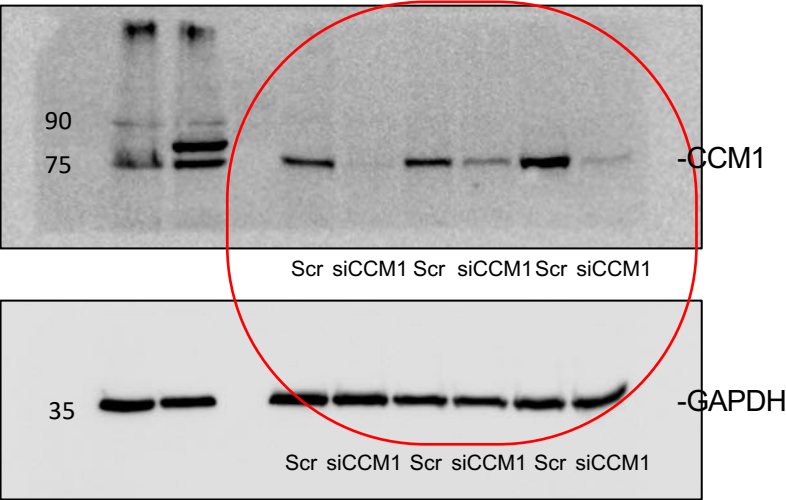

Figure 4A

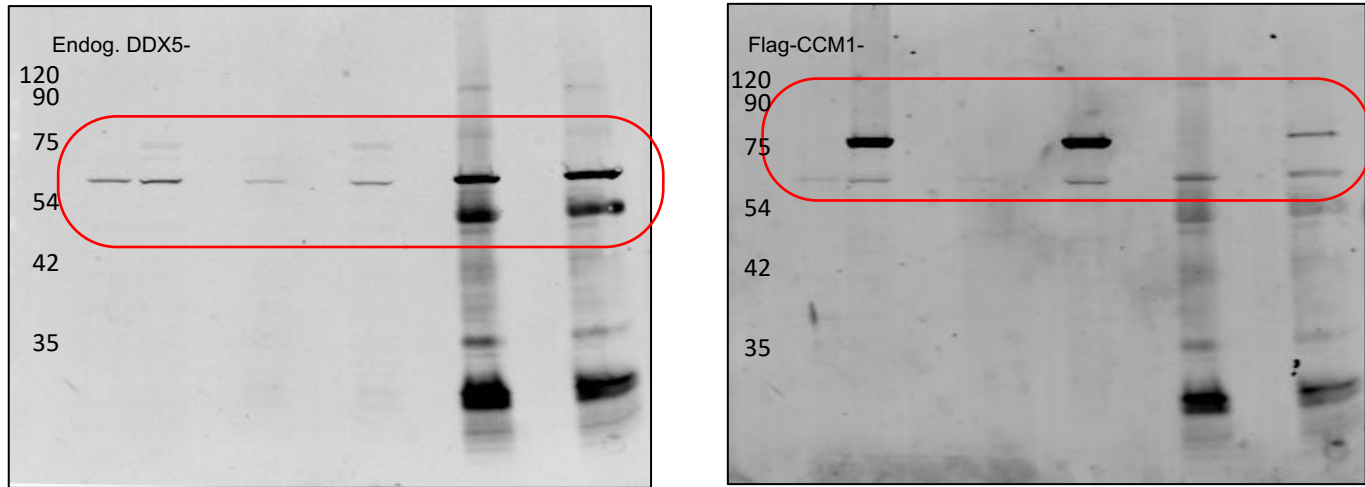

Figure 4B

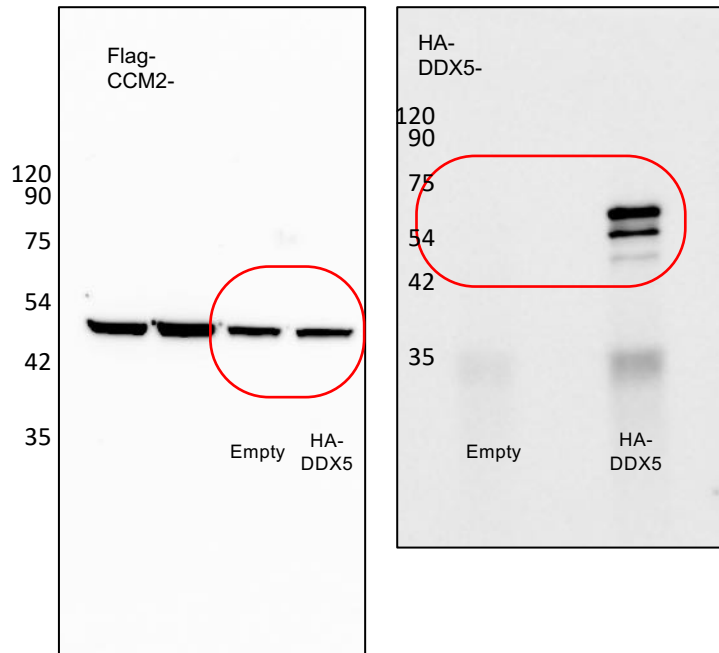

Figure 4C

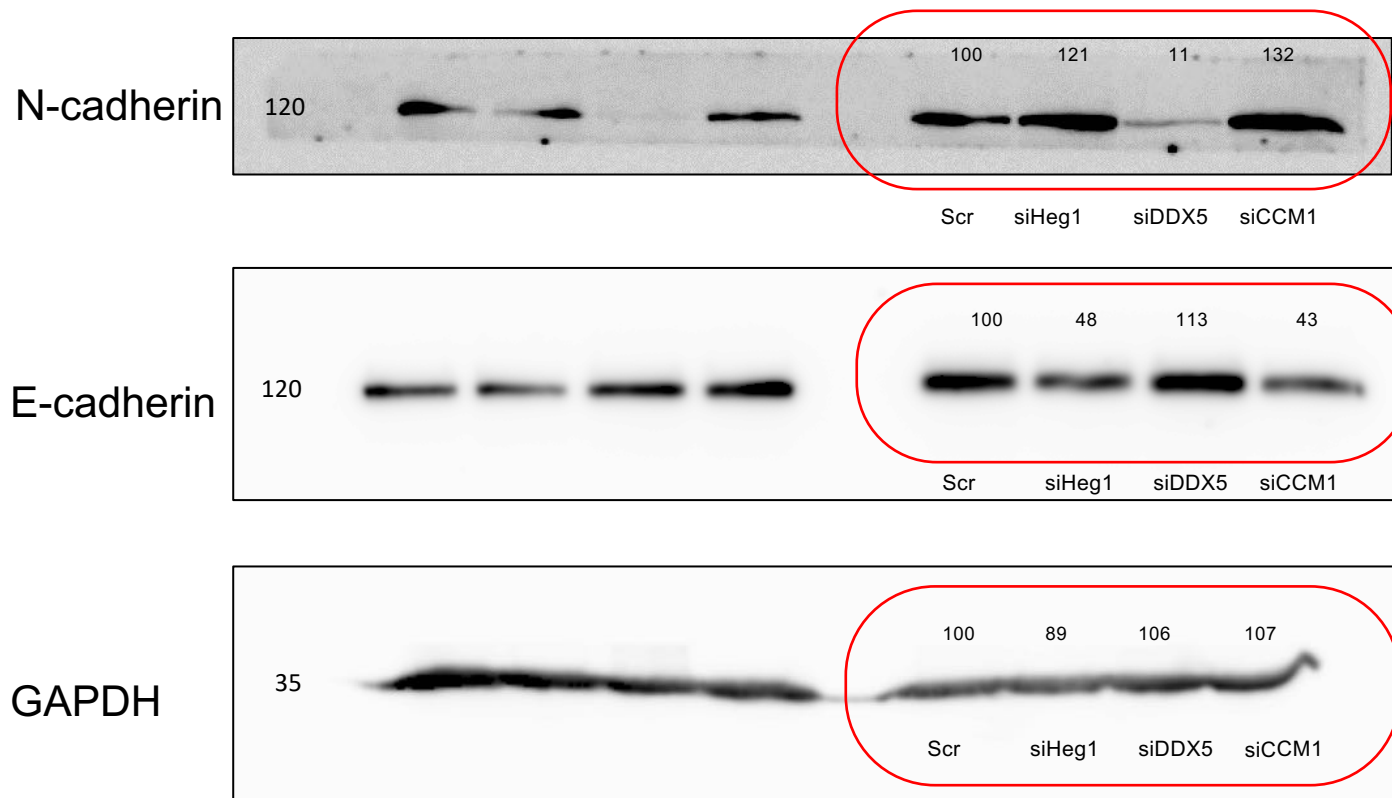

Figure 4E

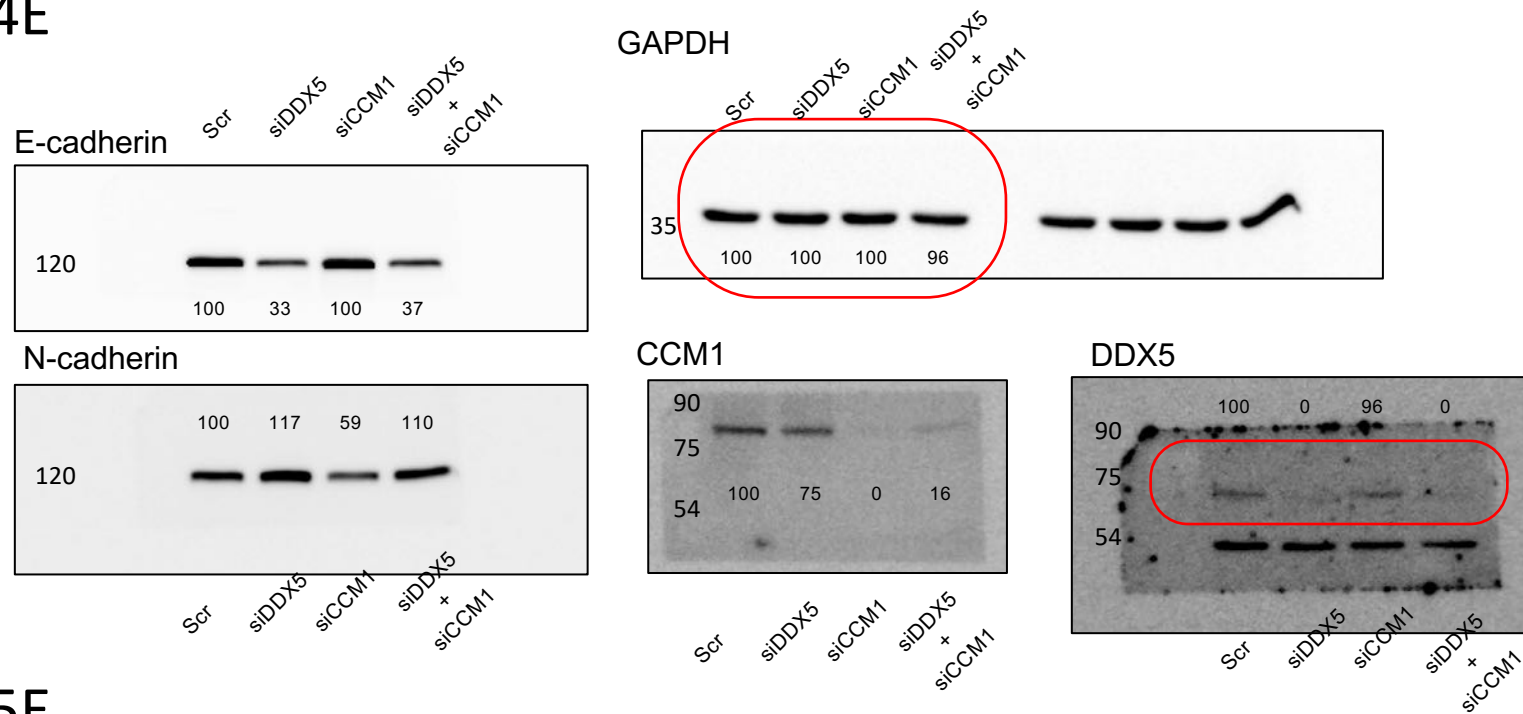

Figure 5E

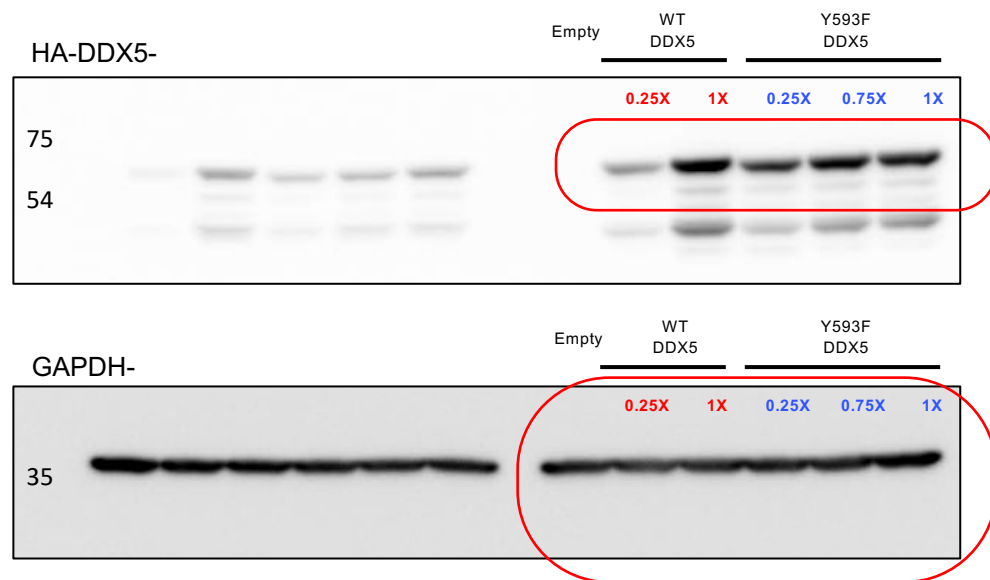

Figure 5G

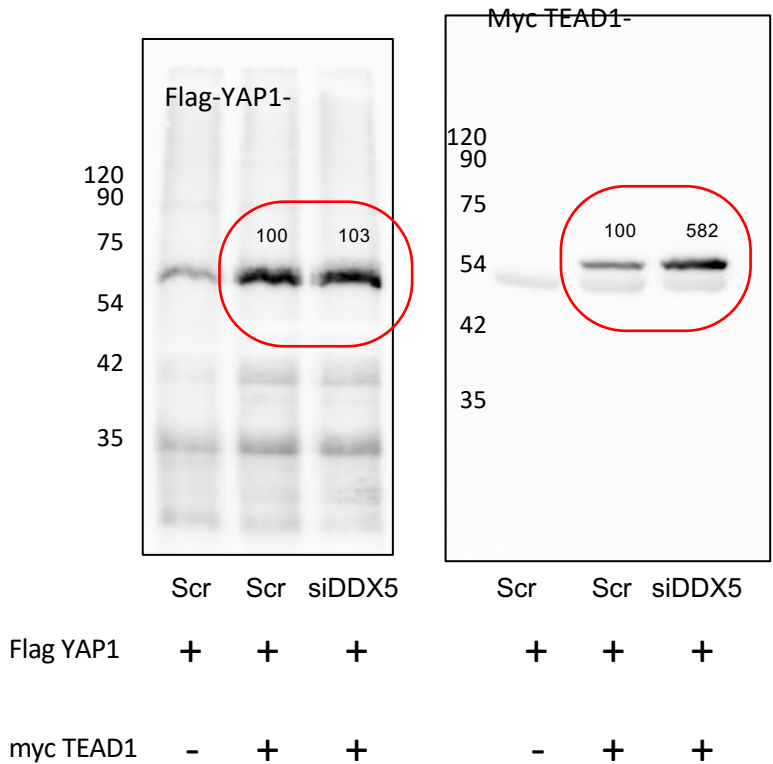

Figure 6A

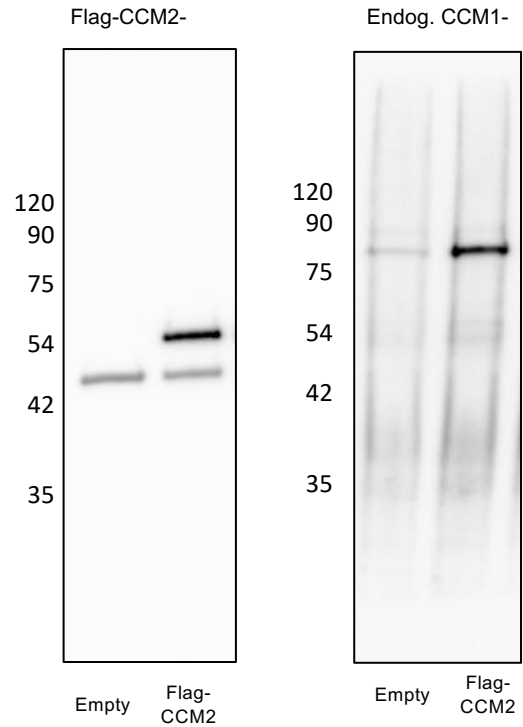

# Figure 6B

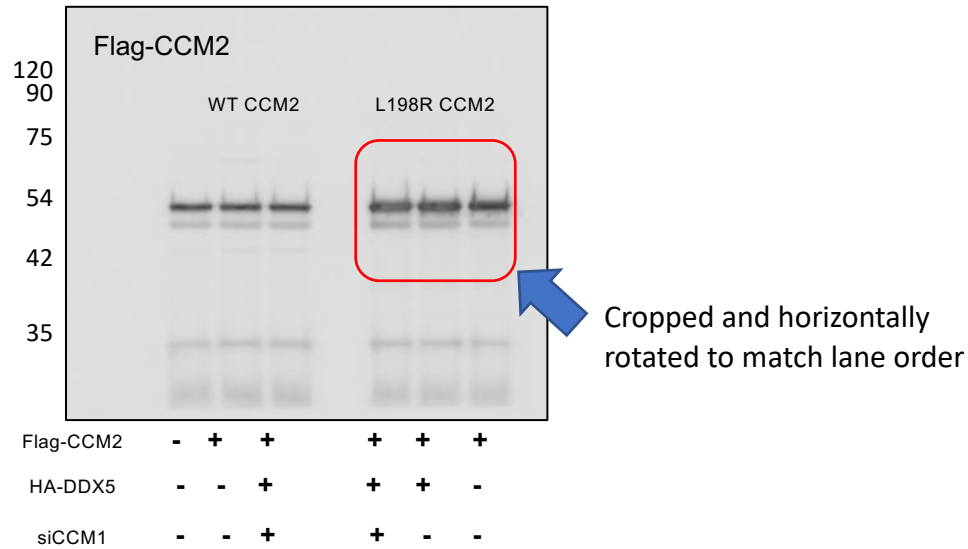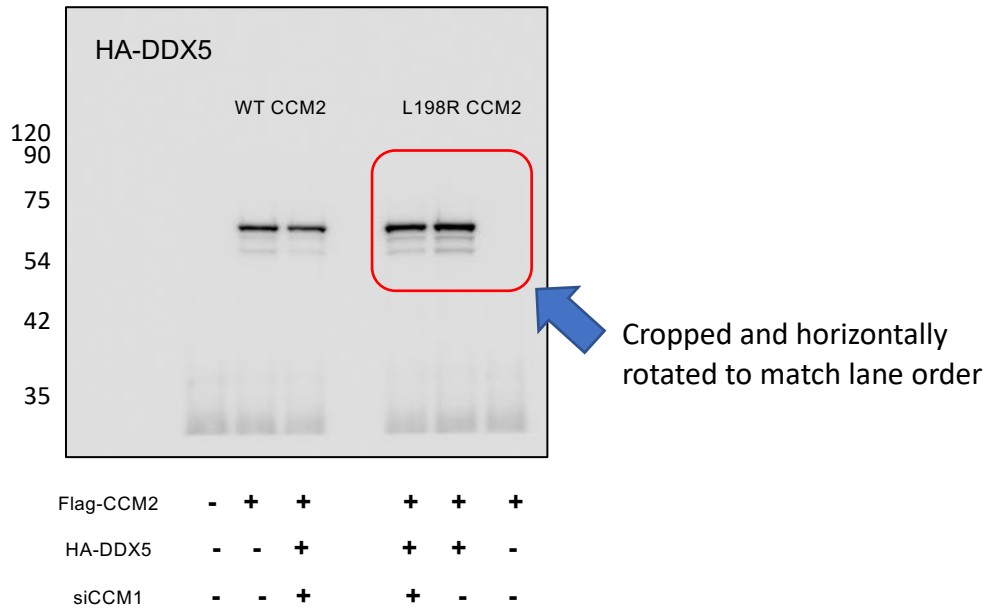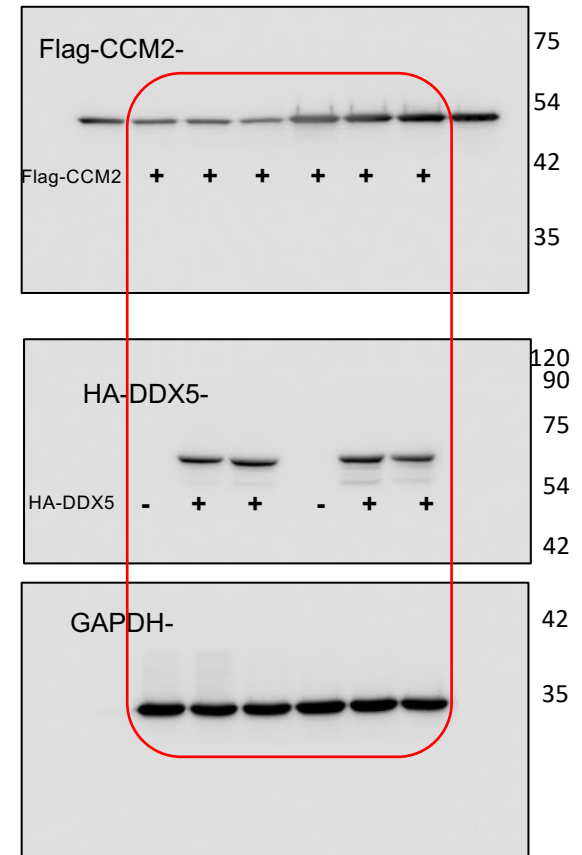

Figure 6C

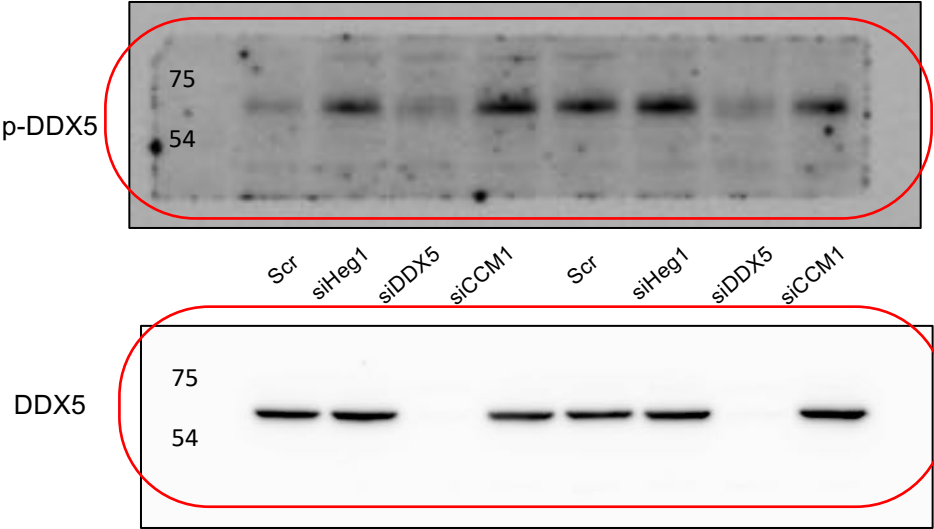

Figure 6D

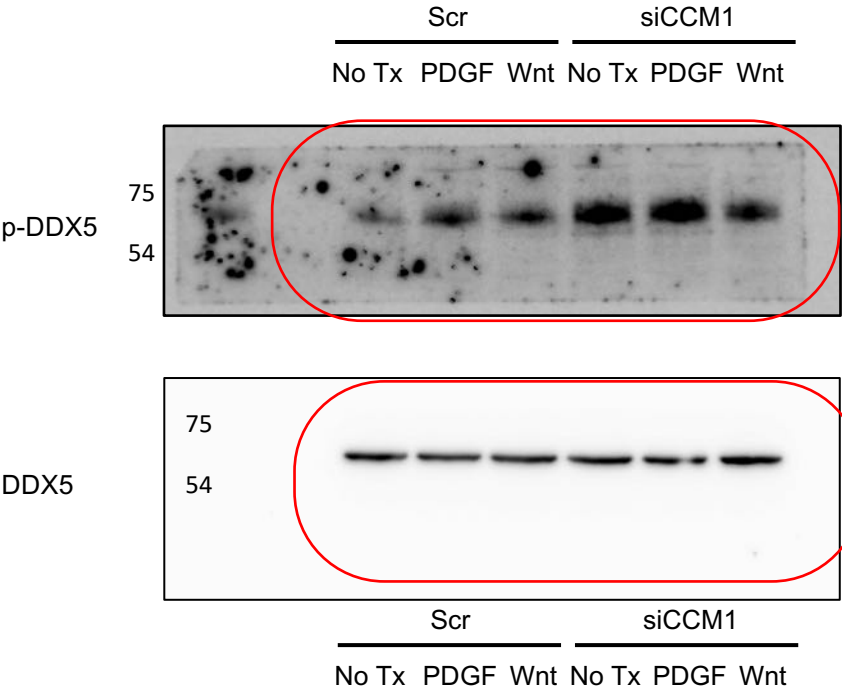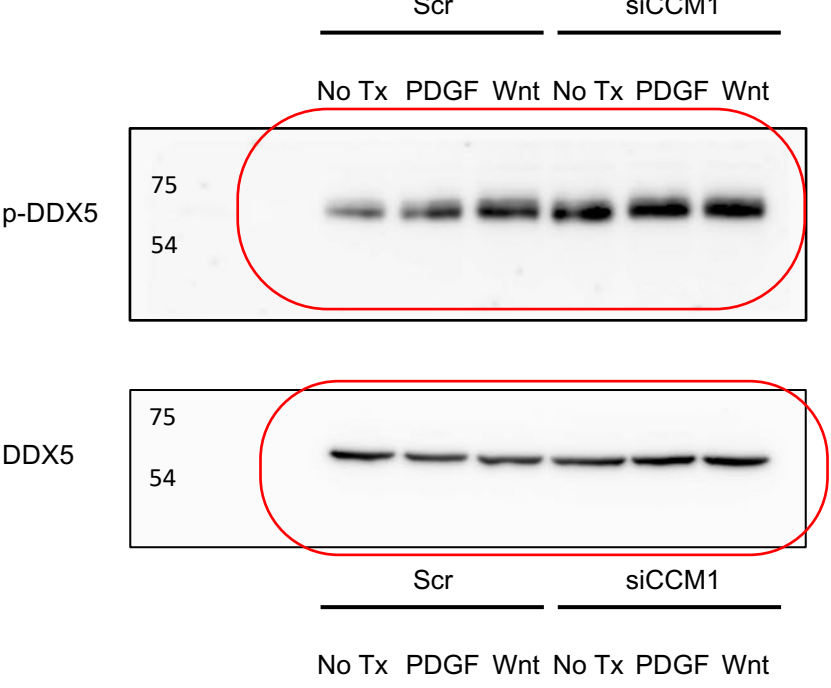

# Figure S3B

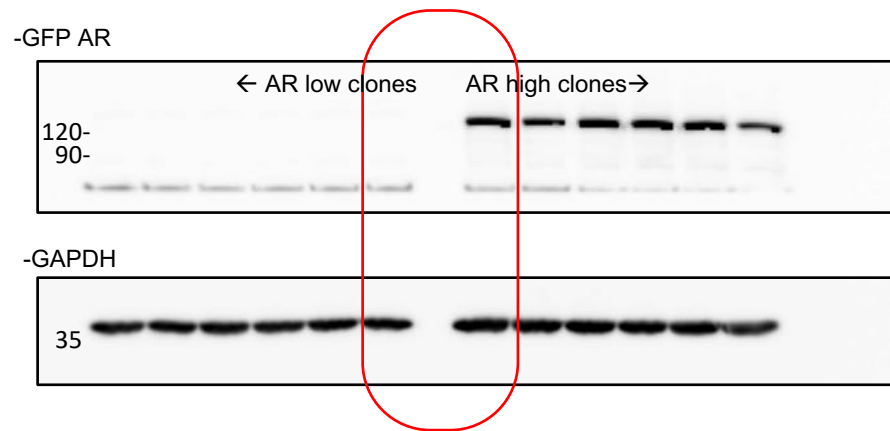

# Figure S5C

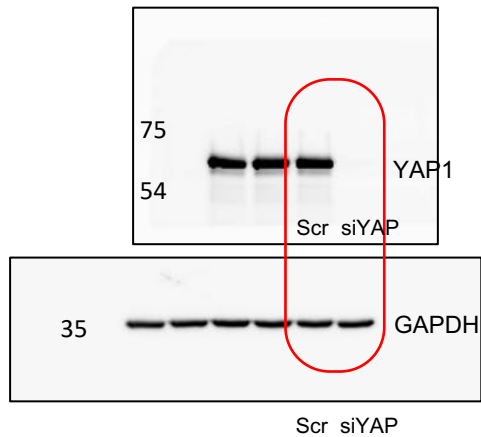

# Figure S5D

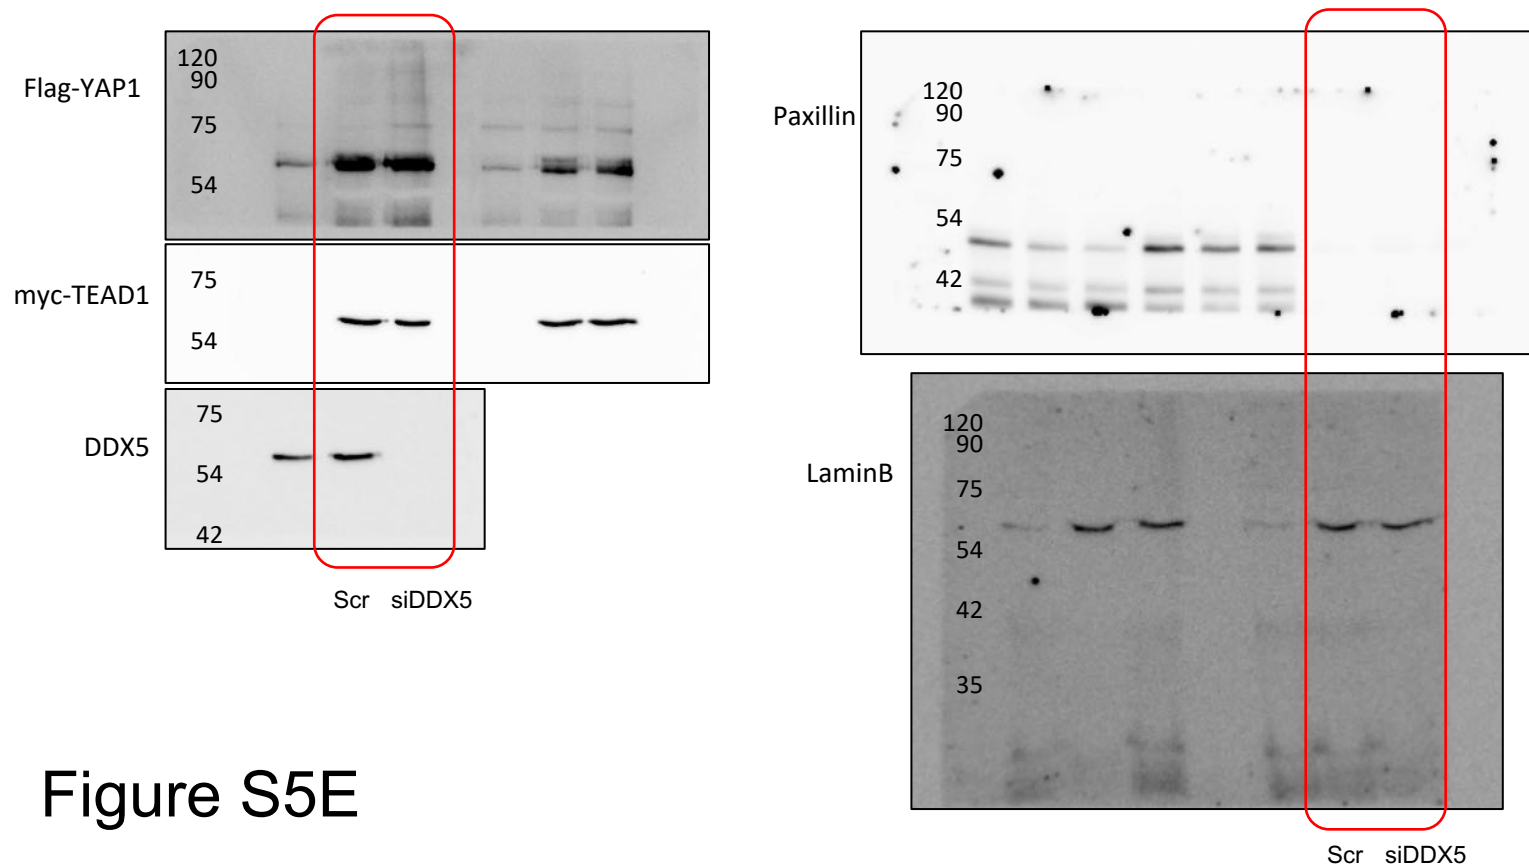

# Figure S5E

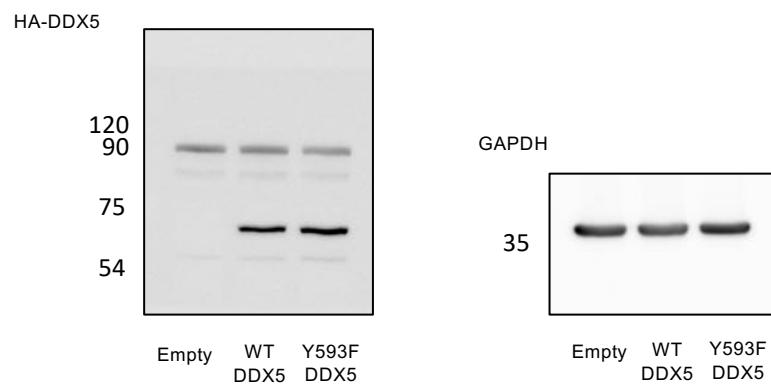

Figure S5G

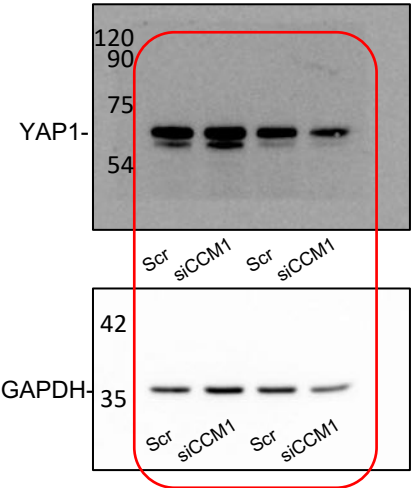

Figure S5J

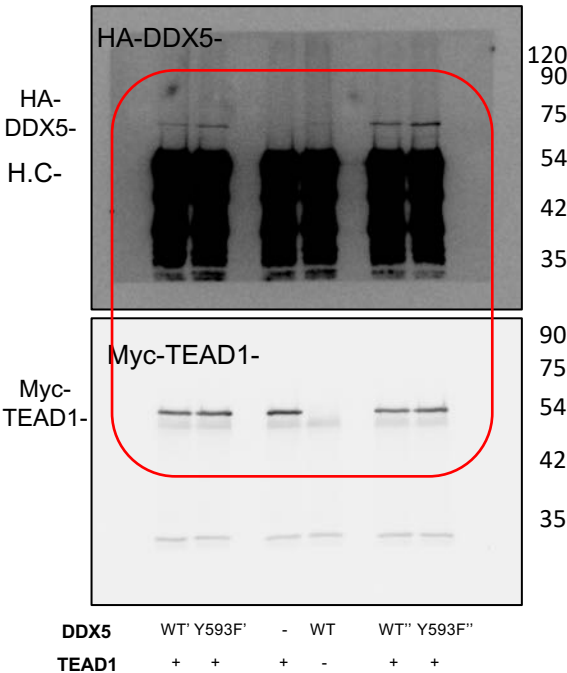

Figure S5H

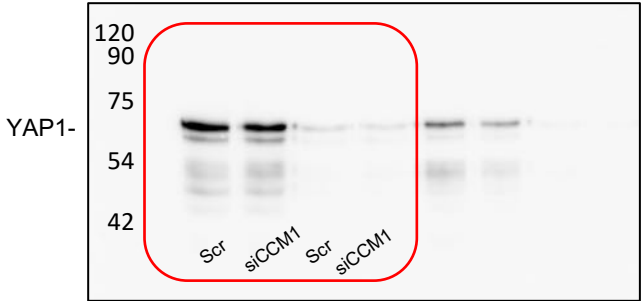

Figure S5I

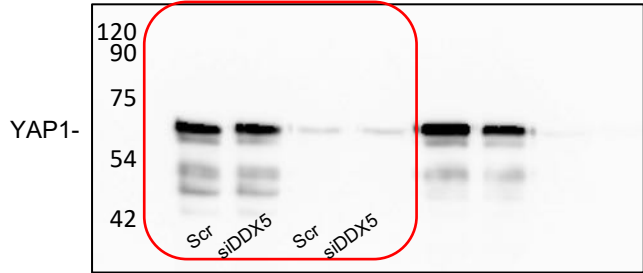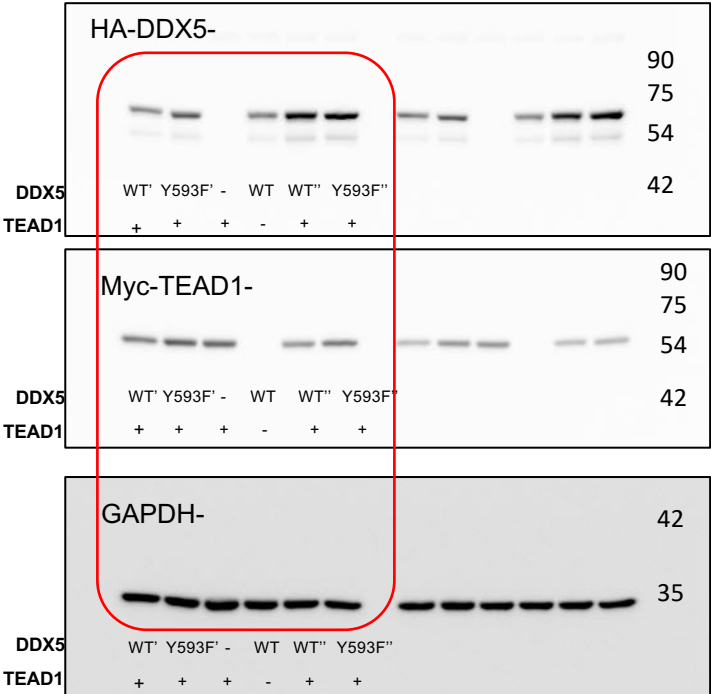

Figure S5K

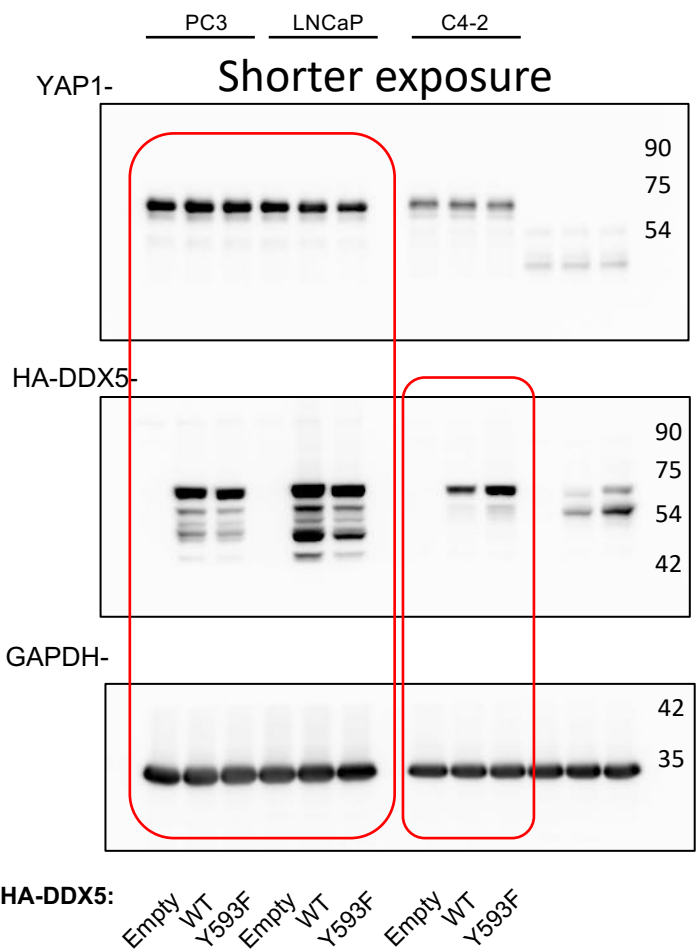

Figure S5L

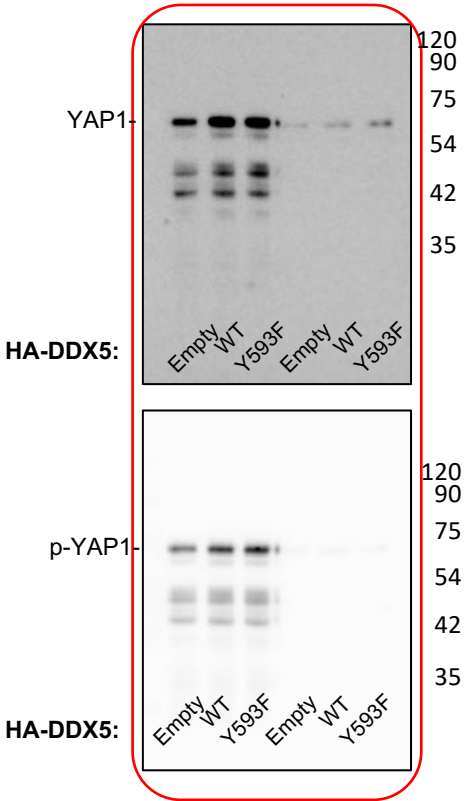

Supplement: s1 [file s1]
